# Supplementary material for: Aspirin increases metabolism through germline signalling to extend the lifespan of Caenorhabditis elegans
Source: PubMed Central journal article supplement (PMC5598954; doi:10.1371/journal.pone.0184027), 2017-09-14

# Supplementary Figure 1

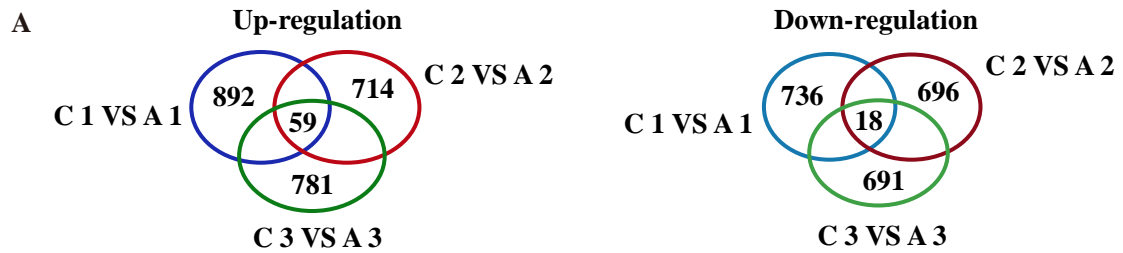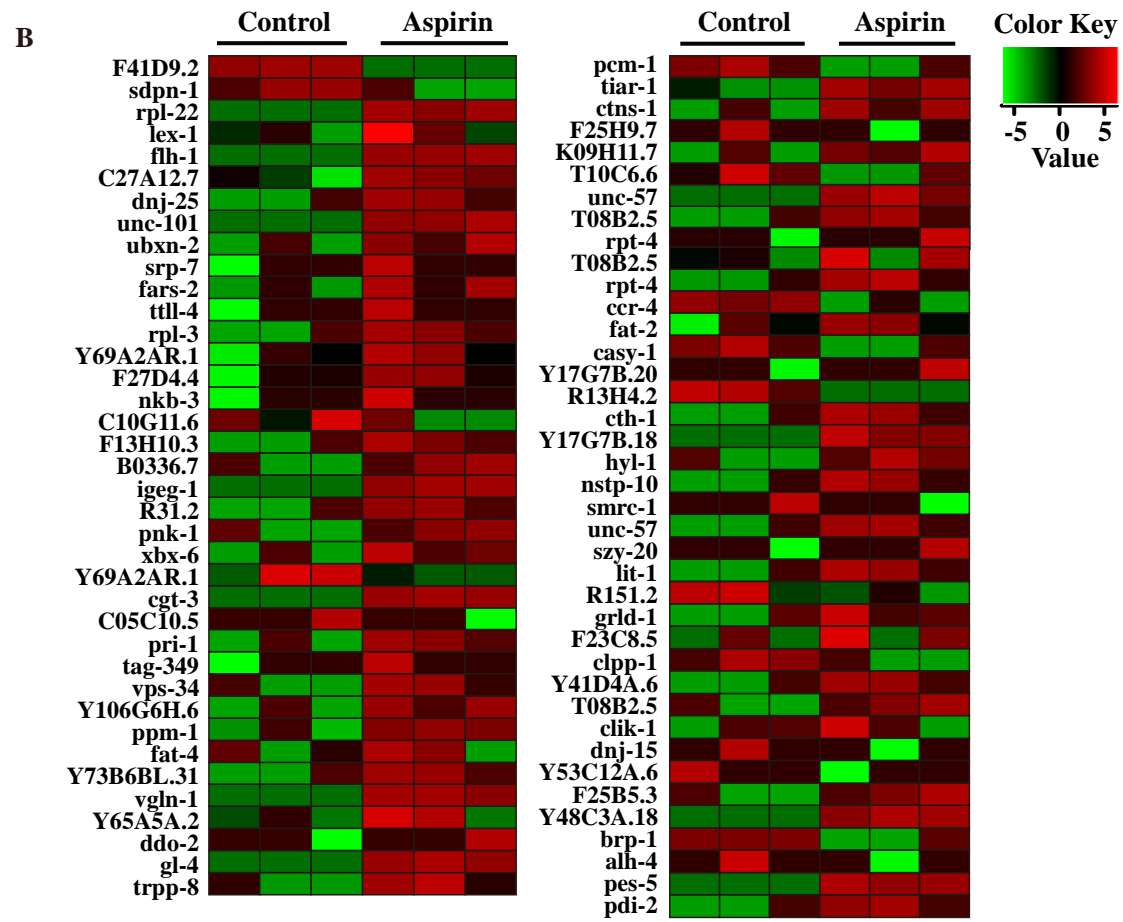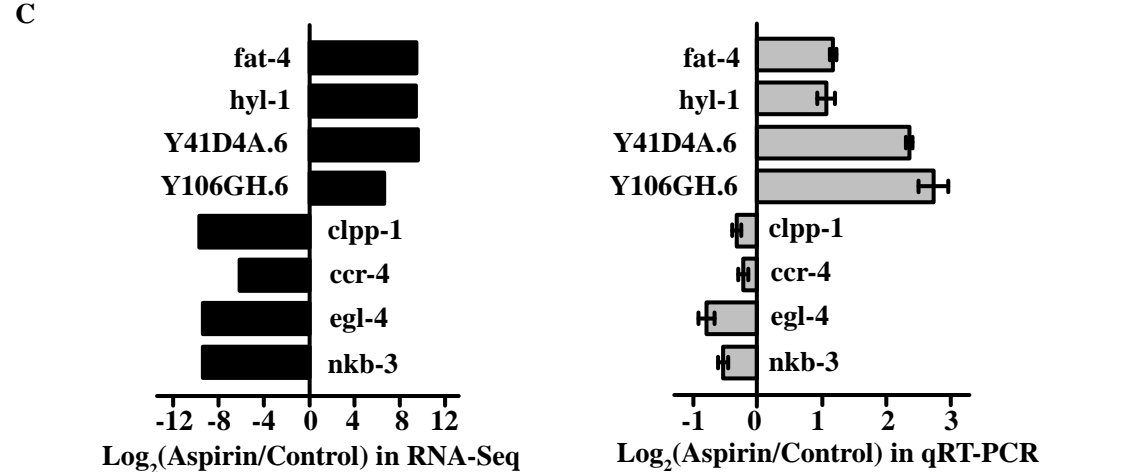

Supplement: pone.0184027.s001.pdf [file pone.0184027.s001.pdf]
