# Supplementary material for: Aspirin increases metabolism through germline signalling to extend the lifespan of Caenorhabditis elegans
Source: PubMed Central journal article supplement (PMC5598954; doi:10.1371/journal.pone.0184027), 2017-09-14
Supplement: pone.0184027.s002.pdf [file pone.0184027.s002.pdf]

**Supplementary Table 1**

| <b>Transcript</b> | <b>WormBase<br/>Gene ID</b> | <b>Description</b>                                                                                | <b>Log<sub>2</sub> Ratio<br/>(Aspirin/Control)</b> | <b>Status</b> |
|-------------------|-----------------------------|---------------------------------------------------------------------------------------------------|----------------------------------------------------|---------------|
| <i>pdi-2</i>      | WBGene00003963              | Oxidative protein folding in the endoplasmic reticulum                                            | 9.9019                                             | Up            |
| <i>pes-5</i>      | WBGene00003979              | Transposon                                                                                        | 9.3000                                             | Up            |
| <i>alh-4</i>      | WBGene00000110              | Determination of adult lifespan, embryo development, nematode larval development and reproduction | -10.1699                                           | Down          |
| <i>brp-1</i>      | WBGene00000273              | Activate the mating pheromone responsive genes                                                    | -3.3008                                            | Down          |
| Y48C3A.18         | WBGene00012997              | Double-stranded RNA binding activity                                                              | 9.5875                                             | Up            |
| F25B5.3           | WBGene00017775              | Orthologous to the human gene NT5C3                                                               | 9.2432                                             | Up            |
| Y53C12A.6         | WBGene00013141              | Unclassified                                                                                      | -9.3007                                            | Down          |
| <i>dnj-15</i>     | WBGene00001033              | Encodes a protein containing a DnaJ ('J') domain                                                  | -9.2487                                            | Down          |
| <i>clik-1</i>     | WBGene00020808              | Orthologous to the human gene CNN and TAGLN                                                       | 5.4686                                             | Up            |
| T08B2.5           | WBGene00020346              | Reproduction                                                                                      | 9.1557                                             | Up            |
| Y41D4A.6          | WBGene00021508              | Development, lipid storage, and carbon-nitrogen ligase activity                                   | 9.5629                                             | Up            |
| <i>clpp-1</i>     | WBGene00014172              | Encodes a mitochondrial protein                                                                   | -9.7296                                            | Down          |
| F23C8.5           | WBGene00017734              | Orthologous to the human gene ETFB                                                                | 5.8074                                             | Up            |
| <i>grld-1</i>     | WBGene00017929              | Orthologous to the human gene RBM15                                                               | 9.7392                                             | Up            |
| R151.2            | WBGene00020107              | Orthologous to the human gene PRPS1                                                               | -8.6264                                            | Down          |
| <i>lit-1</i>      | WBGene00003048              | Controlling the asymmetry of cell divisions during embryogenesis                                  | 10.4023                                            | Up            |
| <i>szy-20</i>     | WBGene00004105              | Negatively regulate centrosome size,                                                              | 9.2946                                             | Up            |

---

|                |                |                                                                                                                                         |          |      |
|----------------|----------------|-----------------------------------------------------------------------------------------------------------------------------------------|----------|------|
|                |                | duplication, and microtubule-nucleating capacity                                                                                        |          |      |
| <i>smrc-1</i>  | WBGene00015806 | Remodeling of chromatin                                                                                                                 | -9.4485  | Down |
| <i>nstp-10</i> | WBGene00008237 | Orthologous to the human gene LAD II                                                                                                    | 11.0562  | Up   |
| <i>hyl-1</i>   | WBGene00002043 | Regulate lipid, particularly ceramide biosynthesis, regulate of lipid transport, and protein translocation in the endoplasmic reticulum | 9.3627   | Up   |
| Y17G7B.18      | WBGene00012469 | Methyltransferase activity                                                                                                              | 9.9371   | Up   |
| <i>cth-1</i>   | WBGene00009048 | Encodes a putative cystathionine gamma-lyase                                                                                            | 10.5038  | Up   |
| R13H4.2        | WBGene00014826 | Non-coding transcript isoform                                                                                                           | -10.5850 | Down |
| Y17G7B.20      | WBGene00012471 | Body morphogenesis, positive regulation of growth and reproduction                                                                      | 10.0357  | Up   |
| <i>casy-1</i>  | WBGene00000403 | Learning, embryonic development, and proper chemotactic behavior                                                                        | -9.7027  | Down |
| <i>fat-2</i>   | WBGene00001394 | Encodes a delta-12 fatty acyl desaturase                                                                                                | 3.4562   | Up   |
| <i>ccr-4</i>   | WBGene00000376 | Development, determination of adult lifespan, embryo development, locomotion, positive regulation of growth and reproduction            | -6.1817  | Down |
| <i>rpt-4</i>   | WBGene00004504 | Encodes a predicted ATPase subunit of the 19S regulatory complex of the proteasome                                                      | 12.6038  | Up   |
| <i>unc-57</i>  | WBGene00006791 | Synaptic vesicle endocytosis                                                                                                            | 10.3197  | Up   |
| T10C6.6        | WBGene00011688 | Transporter activity                                                                                                                    | 9.6141   | Up   |
| K09H11.7       | WBGene00019604 | Phosphatase activity                                                                                                                    | 9.4831   | Up   |
| F25H9.7        | WBGene00009139 | Orthologous to the human gene ACN9                                                                                                      | -9.5085  | Down |
| <i>ctns-1</i>  | WBGene00008052 | Lysosomal cystine transporter                                                                                                           | 9.3212   | Up   |

---

---

|                |                |                                                                                        |          |      |
|----------------|----------------|----------------------------------------------------------------------------------------|----------|------|
| <i>tiar-1</i>  | WBGene00015943 | Body morphogenesis, determination of adult lifespan, and lots of physiological process | -9.2846  | Down |
| <i>pcm-1</i>   | WBGene00003954 | Longevity and autophagy                                                                | 10.1745  | Up   |
| <i>trpp-8</i>  | WBGene00018512 | Intracellular transport and meiosis                                                    | 9.2881   | Up   |
| <i>egl-4</i>   | WBGene00001173 | Encodes a cyclic GMP-dependent protein kinase                                          | -9.4512  | Down |
| Y106G6H.6      | WBGene00013719 | Embryo development and reproduction                                                    | 6.5433   | Up   |
| <i>ddo-2</i>   | WBGene00017565 | Highest catalytic efficiency on D-aspartate or D-glutamate                             | 9.6287   | Up   |
| Y65A5A.2       | WBGene00013419 | Unclassified                                                                           | 9.1699   | Up   |
| <i>vgl-1</i>   | WBGene00007463 | Body morphogenesis, embryo development and locomotion                                  | 3.4898   | Up   |
| Y73B6BL.31     | WBGene00022252 | Orthologous to the human gene SLC35                                                    | 11.0240  | Up   |
| <i>fat-4</i>   | WBGene00001396 | Encodes a delta-5 fatty acid desaturase                                                | 9.4214   | Up   |
| <i>ppm-1</i>   | WBGene00006460 | Serine/threonine phosphatase activity                                                  | 4.0814   | Up   |
| <i>vps-34</i>  | WBGene00006932 | Vesicular trafficking                                                                  | 9.3106   | Up   |
| <i>tag-349</i> | WBGene00013538 | Ubiquitin-protein transferase activity                                                 | 5.2524   | Up   |
| <i>pri-1</i>   | WBGene00004180 | Embryos for the normal timing of embryonic cell divisions                              | 9.4023   | Up   |
| C05C10.5       | WBGene00007332 | Normal body morphology, chromosome segregation, and embryonic development              | 5.0634   | Up   |
| <i>cgt-3</i>   | WBGene00019127 | Synthesize glucosylceramide                                                            | -9.1948  | Down |
| Y69A2AR.1      | WBGene00022074 | Unclassified                                                                           | 10.3436  | Up   |
| <i>xbx-6</i>   | WBGene00009580 | Orthologous to the human gene FAIM2, TMBIM1 and GRINA                                  | -12.3817 | Down |
| <i>pnk-1</i>   | WBGene00004068 | Apoptotic process, determination of adult lifespan, embryo development,                | 10.0444  | Up   |

---

---

|                |                |                                                                              |         |      |
|----------------|----------------|------------------------------------------------------------------------------|---------|------|
|                |                | lipid storage, nematode larval development and reproduction                  |         |      |
| R31.2          | WBGene00011270 | Localized to the striated muscle myosin thick filament                       | 3.3783  | Up   |
| <i>igeg-1</i>  | WBGene00017901 | Unclarified                                                                  | 9.0989  | Up   |
| B0336.7        | WBGene00015147 | Encodes two isoforms of a protein with a THAP or THAP-like domain            | 9.7016  | Up   |
| F13H10.3       | WBGene00008774 | Orthologous to the human gene SLC38A9                                        | 9.4965  | Up   |
| C10G11.6       | WBGene00015686 | Unclarified                                                                  | 9.4066  | Up   |
| <i>nkb-3</i>   | WBGene00010117 | Orthologous to the human gene P-type ATPases family                          | -9.4228 | Down |
| F27D4.4        | WBGene00009189 | Metal ion binding activity                                                   | 10.6567 | Up   |
| <i>rpl-3</i>   | WBGene00004414 | Required for embryonic and larval viability, fertility, and general health   | 5.7253  | Up   |
| <i>ttl-4</i>   | WBGene00014232 | Initiate glutamyl chains                                                     | 9.3249  | Up   |
| <i>fars-2</i>  | WBGene00013361 | ATP, magnesium ion, tRNA, and phenylalanine-tRNA ligase binding activity     | 9.3302  | Up   |
| <i>srp-7</i>   | WBGene00005648 | Endoplasmic reticulum unfolded protein response                              | 11.8957 | Up   |
| <i>ubxn-2</i>  | WBGene00022381 | Encodes one of six <i>C. elegans</i> UBX domain-containing proteins          | 9.3287  | Up   |
| <i>unc-101</i> | WBGene00006829 | Motility, egg-laying, negative regulation of LET-23 / EGF-receptor signaling | 10.2212 | Up   |
| <i>dnj-25</i>  | WBGene00001043 | Clathrin-mediated endocytosis and for normal development                     | 10.4942 | Up   |
| C27A12.7       | WBGene00016157 | Ubiquitin-protein transferase activity                                       | 9.6540  | Up   |
| <i>flh-1</i>   | WBGene00012435 | Body morphogenesis, embryo                                                   | 6.6614  | Up   |

---

---

|               |                |                                                                     |         |      |
|---------------|----------------|---------------------------------------------------------------------|---------|------|
|               |                | development, negative regulation of transcription                   |         |      |
| <i>lex-1</i>  | WBGene00008682 | Encodes a protein that contains an ATPase domain and a bromo domain | 8.1960  | Up   |
| <i>rpl-22</i> | WBGene00004434 | Protein biosynthesis                                                | 10.2046 | Up   |
| <i>sdpn-1</i> | WBGene00018467 | Localizes to basolateral recycling endosomes                        | -9.3376 | Down |
| F41D9.2       | WBGene00018282 | Unclassified                                                        | -9.6789 | Down |

---
