# Supplementary material for: Aspirin increases metabolism through germline signalling to extend the lifespan of Caenorhabditis elegans
Source: PubMed Central journal article supplement (PMC5598954; doi:10.1371/journal.pone.0184027), 2017-09-14
Supplement: pone.0184027.s003.pdf [file pone.0184027.s003.pdf]

**Supplementary Table 2**

| <b>Figure</b>                          | <b>Strains</b> | <b>Treatments</b>  | <b>Mean Lifespan<br/>± SEM (days)</b> | <b>P value VS<br/>Control</b> | <b>% Change in<br/>Mean Lifespan</b> | <b>N</b> |
|----------------------------------------|----------------|--------------------|---------------------------------------|-------------------------------|--------------------------------------|----------|
| <b>N2 (WT)</b>                         |                |                    |                                       |                               |                                      |          |
| <b>2(A)</b>                            | EXP.1          | 20°C/Control       | 18.244 ± 0.461                        |                               |                                      | 86       |
|                                        | EXP.1          | 20°C/100µM Aspirin | 20.674 ± 0.613                        | <0.001                        | 13.32                                | 67       |
|                                        | EXP.2          | 20°C/Control       | 20.990 ± 0.457                        |                               |                                      | 105      |
|                                        | EXP.2          | 20°C/100µM Aspirin | 23.138 ± 0.460                        | <0.001                        | 10.23                                | 116      |
|                                        | EXP.3          | 20°C/Control       | 20.548 ± 0.548                        |                               |                                      | 62       |
|                                        | EXP.3          | 20°C/100µM Aspirin | 24.485 ± 0.571                        | <0.001                        | 19.16                                | 66       |
| <b>CF1903 <i>glp-1(e2141)III.</i></b>  |                |                    |                                       |                               |                                      |          |
| <b>2(C)</b>                            | EXP.1          | 20°C/Control       | 23.190 ± 0.480                        |                               |                                      | 105      |
|                                        | EXP.1          | 20°C/100µM Aspirin | 23.581 ± 0.579                        | 0.314                         | #                                    | 93       |
|                                        | EXP.2          | 20°C/Control       | 22.219 ± 0.537                        |                               |                                      | 96       |
|                                        | EXP.2          | 20°C/100µM Aspirin | 22.590 ± 0.526                        | 0.664                         | #                                    | 100      |
|                                        | EXP.3          | 20°C/Control       | 22.244 ± 0.554                        |                               |                                      | 90       |
|                                        | EXP.3          | 20°C/100µM Aspirin | 22.434 ± 0.520                        | 0.986                         | #                                    | 83       |
|                                        | EXP.4          | 20°C/Control       | 23.229 ± 0.588                        |                               |                                      | 83       |
|                                        | EXP.4          | 20°C/100µM Aspirin | 23.337 ± 0.533                        | 0.993                         | #                                    | 95       |
| <b>CF1038 <i>daf-16(mu86)I.</i></b>    |                |                    |                                       |                               |                                      |          |
| <b>4(C)</b>                            | EXP.1          | 20°C/Control       | 16.604 ± 0.398                        |                               |                                      | 106      |
|                                        | EXP.1          | 20°C/100µM Aspirin | 16.625 ± 0.409                        | 0.914                         | #                                    | 104      |
|                                        | EXP.2          | 20°C/Control       | 16.887 ± 0.418                        |                               |                                      | 115      |
|                                        | EXP.2          | 20°C/100µM Aspirin | 16.607 ± 0.355                        | 0.287                         | #                                    | 135      |
|                                        | EXP.3          | 20°C/Control       | 16.846 ± 0.377                        |                               |                                      | 123      |
|                                        | EXP.3          | 20°C/100µM Aspirin | 17.056 ± 0.384                        | 0.548                         | #                                    | 126      |
| <b>AA86 <i>daf-12(rh61rh411)X.</i></b> |                |                    |                                       |                               |                                      |          |
| <b>4(B)</b>                            | EXP.1          | 20°C/Control       | 16.211 ± 0.373                        |                               |                                      | 161      |

|             |                                                                                      |                    |              |       |      |     |
|-------------|--------------------------------------------------------------------------------------|--------------------|--------------|-------|------|-----|
|             | EXP.1                                                                                | 20°C/100µM Aspirin | 16.872±0.378 | 0.301 | #    | 141 |
|             | EXP.2                                                                                | 20°C/Control       | 16.232±0.393 |       |      | 138 |
|             | EXP.2                                                                                | 20°C/100µM Aspirin | 16.700±0.394 | 0.340 | #    | 140 |
|             | EXP.3                                                                                | 20°C/Control       | 16.186±0.412 |       |      | 140 |
|             | EXP.3                                                                                | 20°C/100µM Aspirin | 16.331±0.343 | 0.563 | #    | 145 |
|             | <b>AA89 <i>daf-12(rh274)X.</i></b>                                                   |                    |              |       |      |     |
| <b>4(A)</b> | EXP.1                                                                                | 20°C/Control       | 17.903±0.581 |       |      | 113 |
|             | EXP.1                                                                                | 20°C/100µM Aspirin | 17.676±0.582 | 0.827 | #    | 108 |
|             | EXP.2                                                                                | 20°C/Control       | 17.820±0.550 |       |      | 111 |
|             | EXP.2                                                                                | 20°C/100µM Aspirin | 16.529±0.469 | 0.062 | #    | 119 |
|             | EXP.3                                                                                | 20°C/Control       | 18.400±0.543 |       |      | 100 |
|             | EXP.3                                                                                | 20°C/100µM Aspirin | 17.962±0.541 | 0.752 | #    | 104 |
|             | <b>CF1880 <i>glp-1(e2141)III.;daf-16(mu86)I.</i></b>                                 |                    |              |       |      |     |
| <b>5(B)</b> | EXP.1                                                                                | 20°C/Control       | 10.900±0.323 |       |      | 150 |
|             | EXP.1                                                                                | 20°C/100µM Aspirin | 11.096±0.372 | 0.605 | #    | 125 |
|             | EXP.2                                                                                | 20°C/Control       | 12.083±0.361 |       |      | 157 |
|             | EXP.2                                                                                | 20°C/100µM Aspirin | 11.377±0.322 | 0.162 | #    | 159 |
|             | EXP.3                                                                                | 20°C/Control       | 11.966±0.368 |       |      | 146 |
|             | EXP.3                                                                                | 20°C/100µM Aspirin | 11.817±0.341 | 0.806 | #    | 153 |
|             | EXP.4                                                                                | 20°C/Control       | 11.392±0.362 |       |      | 120 |
|             | EXP.4                                                                                | 20°C/100µM Aspirin | 11.703±0.355 | 0.384 | #    | 148 |
|             | <b><i>glp-1(e2141)III.; daf-12(rh61rh411)X.</i></b>                                  |                    |              |       |      |     |
| <b>5(A)</b> | EXP.1                                                                                | 20°C/Control       | 17.000±0.497 |       |      | 148 |
|             | EXP.1                                                                                | 20°C/100µM Aspirin | 16.632±0.576 | 0.799 | #    | 133 |
|             | EXP.2                                                                                | 20°C/Control       | 17.353±0.528 |       |      | 167 |
|             | EXP.2                                                                                | 20°C/100µM Aspirin | 16.500±0.538 | 0.143 | #    | 134 |
|             | EXP.3                                                                                | 20°C/Control       | 17.017±0.614 |       |      | 120 |
|             | EXP.3                                                                                | 20°C/100µM Aspirin | 17.664±0.563 | 0.618 | 3.80 | 134 |
|             | <b>CF2248 <i>glp-1(e2141)III.; daf-12(rh61rh411)X.; daf-16(mu86)I.; muEx158.</i></b> |                    |              |       |      |     |

---

|             |       |                    |              |       |   |     |
|-------------|-------|--------------------|--------------|-------|---|-----|
| <b>5(C)</b> | EXP.1 | 20°C/Control       | 11.525±0.313 |       |   | 181 |
|             | EXP.1 | 20°C/100µM Aspirin | 10.920±0.302 | 0.182 | # | 175 |
|             | EXP.2 | 20°C/Control       | 11.746±0.309 |       |   | 197 |
|             | EXP.2 | 20°C/100µM Aspirin | 11.874±0.315 | 0.928 | # | 183 |
|             | EXP.3 | 20°C/Control       | 11.786±0.287 |       |   | 220 |
|             | EXP.3 | 20°C/100µM Aspirin | 11.270±0.296 | 0.310 | # | 200 |
|             | EXP.4 | 20°C/Control       | 11.516±0.283 |       |   | 217 |
|             | EXP.4 | 20°C/100µM Aspirin | 11.479±0.325 | 0.799 | # | 188 |

---
