# Supplementary material for: Aspirin increases metabolism through germline signalling to extend the lifespan of Caenorhabditis elegans
Source: PubMed Central journal article supplement (PMC5598954; doi:10.1371/journal.pone.0184027), 2017-09-14
Supplement: pone.0184027.s004.pdf [file pone.0184027.s004.pdf]

**Supplementary Table 3**

| <b>Figure</b>                          | <b>Strains</b> | <b>Treatments</b>  | <b>Mean Lifespan<br/>± SEM (hours)</b> | <b>P value VS<br/>Control</b> | <b>% Change in<br/>mean lifespan</b> | <b>N</b> |
|----------------------------------------|----------------|--------------------|----------------------------------------|-------------------------------|--------------------------------------|----------|
| <b>N2 (WT)</b>                         |                |                    |                                        |                               |                                      |          |
| <b>2(B)</b>                            | EXP.1          | 35°C/Control       | 6.926±0.377                            |                               |                                      | 54       |
|                                        | EXP.1          | 35°C/100µM Aspirin | 9.544±0.456                            | <0.001                        | 37.79                                | 57       |
|                                        | EXP.2          | 35°C/Control       | 7.509±0.392                            |                               |                                      | 57       |
|                                        | EXP.2          | 35°C/100µM Aspirin | 8.828±0.391                            | 0.032                         | 17.57                                | 58       |
|                                        | EXP.3          | 35°C/Control       | 7.214±0.377                            |                               |                                      | 56       |
|                                        | EXP.3          | 35°C/100µM Aspirin | 9.152±0.419                            | <0.001                        | 26.86                                | 59       |
| <b>CF1903 <i>glp-1(e2141)III</i>.</b>  |                |                    |                                        |                               |                                      |          |
| <b>2(D)</b>                            | EXP.1          | 35°C/Control       | 5.717±0.144                            |                               |                                      | 92       |
|                                        | EXP.1          | 35°C/100µM Aspirin | 5.537±0.135                            | 0.357                         | #                                    | 95       |
|                                        | EXP.2          | 35°C/Control       | 5.853±0.135                            |                               |                                      | 95       |
|                                        | EXP.2          | 35°C/100µM Aspirin | 5.957±0.145                            | 0.586                         | #                                    | 94       |
|                                        | EXP.3          | 35°C/Control       | 5.692±0.136                            |                               |                                      | 91       |
|                                        | EXP.3          | 35°C/100µM Aspirin | 5.546±0.126                            | 0.430                         | #                                    | 97       |
| <b>CF1038 <i>daf-16(mu86)I</i>.</b>    |                |                    |                                        |                               |                                      |          |
| <b>4(F)</b>                            | EXP.1          | 35°C/Control       | 10.379±0.370                           |                               |                                      | 58       |
|                                        | EXP.1          | 35°C/100µM Aspirin | 10.271±0.322                           | 0.605                         | #                                    | 59       |
|                                        | EXP.2          | 35°C/Control       | 10.370±0.359                           |                               |                                      | 54       |
|                                        | EXP.2          | 35°C/100µM Aspirin | 10.355±0.340                           | 0.999                         | #                                    | 62       |
|                                        | EXP.3          | 35°C/Control       | 10.107±0.358                           |                               |                                      | 56       |
|                                        | EXP.3          | 35°C/100µM Aspirin | 10.475±0.333                           | 0.523                         | 3.6                                  | 59       |
| <b>AA86 <i>daf-12(rh61rh411)X</i>.</b> |                |                    |                                        |                               |                                      |          |
| <b>4(E)</b>                            | EXP.1          | 35°C/Control       | 8.517±0.401                            |                               |                                      | 58       |
|                                        | EXP.1          | 35°C/100µM Aspirin | 8.640±0.466                            | 0.750                         | #                                    | 50       |
|                                        | EXP.2          | 35°C/Control       | 8.222±0.415                            |                               |                                      | 54       |

|             |                                    |                     |              |       |   |    |
|-------------|------------------------------------|---------------------|--------------|-------|---|----|
|             | EXP.2                              | 35 °C/100μM Aspirin | 8.456±0.422  | 0.631 | # | 57 |
|             | EXP.3                              | 35 °C/Control       | 8.194±0.349  |       |   | 62 |
|             | EXP.3                              | 35 °C/100μM Aspirin | 8.271±0.343  | 0.950 | # | 59 |
|             | <b>AA89 <i>daf-12(rh274)X</i>.</b> |                     |              |       |   |    |
| <b>4(D)</b> | EXP.1                              | 35 °C/Control       | 10.800±0.295 |       |   | 80 |
|             | EXP.1                              | 35 °C/100μM Aspirin | 10.831±0.292 | 0.989 | # | 77 |
|             | EXP.2                              | 35 °C/Control       | 10.810±0.283 |       |   | 79 |
|             | EXP.2                              | 35 °C/100μM Aspirin | 10.571±0.291 | 0.608 | # | 77 |
|             | EXP.3                              | 35 °C/Control       | 10.550±0.295 |       |   | 80 |
|             | EXP.3                              | 35 °C/100μM Aspirin | 10.487±0.301 | 0.892 | # | 78 |
