# Supplementary material for: Aspirin increases metabolism through germline signalling to extend the lifespan of Caenorhabditis elegans
Source: PubMed Central journal article supplement (PMC5598954; doi:10.1371/journal.pone.0184027), 2017-09-14
Supplement: pone.0184027.s005.pdf [file pone.0184027.s005.pdf]

**Supplementary Table 4**

| <b>Figure</b>                          | <b>Strains</b> | <b>Treatments</b>        | <b>Relative intensity <math>\pm</math>SEM</b> | <b>P value VS Control</b> | <b>N</b> |
|----------------------------------------|----------------|--------------------------|-----------------------------------------------|---------------------------|----------|
| <b>N2 (WT)</b>                         |                |                          |                                               |                           |          |
| <b>3(A)</b>                            | EXP.1          | 20°C/Control             | 0.982 $\pm$ 0.007                             |                           | 62       |
| <b>3(B)</b>                            | EXP.1          | 20°C/100 $\mu$ M Aspirin | 0.909 $\pm$ 0.008                             | <0.001                    | 71       |
|                                        | EXP.2          | 20°C/Control             | 0.929 $\pm$ 0.012                             |                           | 63       |
|                                        | EXP.2          | 20°C/100 $\mu$ M Aspirin | 0.825 $\pm$ 0.011                             | <0.001                    | 60       |
|                                        | EXP.3          | 20°C/Control             | 1.089 $\pm$ 0.012                             |                           | 67       |
|                                        | EXP.3          | 20°C/100 $\mu$ M Aspirin | 0.984 $\pm$ 0.010                             | <0.001                    | 69       |
| <b>CF1903 <i>glp-1(e2141)III</i>.</b>  |                |                          |                                               |                           |          |
| <b>3(C)</b>                            | EXP.1          | 20°C/Control             | 1.007 $\pm$ 0.012                             |                           | 45       |
| <b>3(D)</b>                            | EXP.1          | 20°C/100 $\mu$ M Aspirin | 1.030 $\pm$ 0.009                             | 0.101                     | 53       |
|                                        | EXP.2          | 20°C/Control             | 0.994 $\pm$ 0.010                             |                           | 62       |
|                                        | EXP.2          | 20°C/100 $\mu$ M Aspirin | 0.979 $\pm$ 0.009                             | 0.255                     | 61       |
|                                        | EXP.3          | 20°C/Control             | 0.999 $\pm$ 0.011                             |                           | 65       |
|                                        | EXP.3          | 20°C/100 $\mu$ M Aspirin | 0.989 $\pm$ 0.010                             | 0.512                     | 66       |
| <b>CF1038 <i>daf-16(mu86)I</i>.</b>    |                |                          |                                               |                           |          |
| <b>4(I)</b>                            | EXP.1          | 20°C/Control             | 0.954 $\pm$ 0.006                             |                           | 113      |
| <b>4(L)</b>                            | EXP.1          | 20°C/100 $\mu$ M Aspirin | 0.965 $\pm$ 0.006                             | 0.192                     | 113      |
|                                        | EXP.2          | 20°C/Control             | 1.002 $\pm$ 0.007                             |                           | 96       |
|                                        | EXP.2          | 20°C/100 $\mu$ M Aspirin | 1.021 $\pm$ 0.008                             | 0.071                     | 103      |
|                                        | EXP.3          | 20°C/Control             | 1.044 $\pm$ 0.064                             |                           | 126      |
|                                        | EXP.3          | 20°C/100 $\mu$ M Aspirin | 1.036 $\pm$ 0.007                             | 0.399                     | 129      |
| <b>AA86 <i>daf-12(rh61rh411)X</i>.</b> |                |                          |                                               |                           |          |
| <b>4(H)</b>                            | EXP.1          | 20°C/Control             | 1.012 $\pm$ 0.008                             |                           | 87       |
| <b>4(K)</b>                            | EXP.1          | 20°C/100 $\mu$ M Aspirin | 1.034 $\pm$ 0.007                             | 0.057                     | 82       |
|                                        | EXP.2          | 20°C/Control             | 1.001 $\pm$ 0.007                             |                           | 117      |
|                                        | EXP.2          | 20°C/100 $\mu$ M Aspirin | 1.004 $\pm$ 0.009                             | 0.295                     | 107      |

---

|             |                                    |                    |             |       |     |
|-------------|------------------------------------|--------------------|-------------|-------|-----|
|             | EXP.3                              | 20°C/Control       | 0.956±0.007 |       | 99  |
|             | EXP.3                              | 20°C/100µM Aspirin | 0.961±0.007 | 0.645 | 97  |
|             | <b>AA89 <i>daf-12(rh274)X</i>.</b> |                    |             |       |     |
| <b>4(G)</b> | EXP.1                              | 20°C/Control       | 0.969±0.008 |       | 73  |
| <b>4(J)</b> | EXP.1                              | 20°C/100µM Aspirin | 0.987±0.009 | 0.144 | 73  |
|             | EXP.2                              | 20°C/Control       | 1.052±0.008 |       | 102 |
|             | EXP.2                              | 20°C/100µM Aspirin | 1.045±0.007 | 0.563 | 106 |
|             | EXP.3                              | 20°C/Control       | 0.979±0.009 |       | 79  |
|             | EXP.3                              | 20°C/100µM Aspirin | 0.973±0.009 | 0.657 | 81  |

---
