# Supplementary material for: Aspirin increases metabolism through germline signalling to extend the lifespan of Caenorhabditis elegans
Source: PubMed Central journal article supplement (PMC5598954; doi:10.1371/journal.pone.0184027), 2017-09-14
Supplement: pone.0184027.s006.pdf [file pone.0184027.s006.pdf]

**Supplementary Table 5**

| <b>Figure</b> | <b>Strains</b> | <b>Treatments</b>        | <b>Relative intensity <math>\pm</math>SEM</b> | <b>P value VS Control</b> | <b>N</b> |
|---------------|----------------|--------------------------|-----------------------------------------------|---------------------------|----------|
|               | <b>N2(WT)</b>  |                          |                                               |                           |          |
| <b>3(E)</b>   | EXP.1          | 20°C/Control             | 0.957 $\pm$ 0.037                             |                           | 51       |
| <b>3(F)</b>   | EXP.1          | 20°C/100 $\mu$ M Aspirin | 0.782 $\pm$ 0.026                             | <0.001                    | 50       |
|               | EXP.2          | 20°C/Control             | 0.994 $\pm$ 0.042                             |                           | 62       |
|               | EXP.2          | 20°C/100 $\mu$ M Aspirin | 0.789 $\pm$ 0.024                             | <0.001                    | 62       |
|               | EXP.3          | 20°C/Control             | 1.049 $\pm$ 0.047                             |                           | 50       |
|               | EXP.3          | 20°C/100 $\mu$ M Aspirin | 0.838 $\pm$ 0.024                             | <0.001                    | 51       |
