# Supplementary material for: Aspirin increases metabolism through germline signalling to extend the lifespan of Caenorhabditis elegans
Source: PubMed Central journal article supplement (PMC5598954; doi:10.1371/journal.pone.0184027), 2017-09-14
Supplement: pone.0184027.s007.pdf [file pone.0184027.s007.pdf]

**Supplementary Table 6**

| <b>Figure</b>  | <b>Strains</b>            | <b>Treatments</b>  | <b>Day1</b> | <b>Day2</b> | <b>Day3</b> | <b>Day4</b> | <b>Day5</b> | <b>Day6</b> | <b>Day7</b> | <b>Total</b> | <b>N</b> |
|----------------|---------------------------|--------------------|-------------|-------------|-------------|-------------|-------------|-------------|-------------|--------------|----------|
| <b>N2 (WT)</b> |                           |                    |             |             |             |             |             |             |             |              |          |
| <b>2(E)</b>    | EXP.1                     | 20°C/Control       | 30.83       | 62.07       | 43.50       | 31.36       | 14.50       | 5.68        | 1.67        | 189.61       | 29       |
|                | EXP.1                     | 20°C/100µM Aspirin | 31.96       | 62.81       | 45.55       | 30.12       | 16.05       | 4.33        | 1.77        | 192.59       | 28       |
|                | EXP.2                     | 20°C/Control       | 17.95       | 77.11       | 68.95       | 47.42       | 17.95       | 3.63        | 0.37        | 233.37       | 26       |
|                | EXP.2                     | 20°C/100µM Aspirin | 16.74       | 73.68       | 62.26       | 43.42       | 16.21       | 3.74        | 1.05        | 217.11       | 25       |
|                | EXP.3                     | 20°C/Control       | 27.52       | 76.13       | 76.04       | 34.43       | 9.17        | 1.83        | 0.74        | 225.87       | 35       |
|                | EXP.3                     | 20°C/100µM Aspirin | 27.17       | 73.13       | 73.30       | 38.87       | 10.04       | 0.78        | 0.52        | 223.83       | 37       |
|                | <b>Mean</b>               | 20°C/Control       | 25.43       | 71.77       | 62.83       | 37.74       | 13.87       | 3.71        | 0.93        | 216.28       |          |
|                | <b>SEM</b>                |                    | 3.86        | 4.86        | 9.88        | 4.92        | 2.55        | 1.11        | 0.39        | 13.51        |          |
|                | <b>Mean</b>               | 20°C/100µM Aspirin | 25.29       | 69.87       | 60.37       | 37.47       | 14.10       | 2.95        | 1.11        | 211.18       |          |
|                | <b>SEM</b>                |                    | 4.49        | 3.54        | 8.07        | 3.90        | 2.03        | 1.09        | 0.36        | 9.49         |          |
|                | <b>P value VS Control</b> |                    | 0.98        | 0.77        | 0.86        | 0.97        | 0.95        | 0.65        | 0.74        | 0.98         |          |
