# Supplementary material for: Aspirin increases metabolism through germline signalling to extend the lifespan of Caenorhabditis elegans
Source: PubMed Central journal article supplement (PMC5598954; doi:10.1371/journal.pone.0184027), 2017-09-14
Supplement: pone.0184027.s008.pdf [file pone.0184027.s008.pdf]

**Supplementary Table 7**

| <b>Figure</b> | <b>Strains</b> | <b>Treatments</b>        | <b>Mean number <math>\pm</math>SEM</b> | <b>P value VS Control</b> | <b>N</b> |
|---------------|----------------|--------------------------|----------------------------------------|---------------------------|----------|
|               | <b>N2(WT)</b>  |                          |                                        |                           |          |
| <b>2(F)</b>   | EXP.1          | 20°C/Control             | 169.323 $\pm$ 5.210                    |                           | 31       |
|               | EXP.1          | 20°C/100 $\mu$ M Aspirin | 142.286 $\pm$ 3.915                    | <0.001                    | 35       |
|               | EXP.2          | 20°C/Control             | 157.162 $\pm$ 3.854                    |                           | 37       |
|               | EXP.2          | 20°C/100 $\mu$ M Aspirin | 138.750 $\pm$ 4.412                    | 0.002                     | 44       |
|               | EXP.3          | 20°C/Control             | 159.844 $\pm$ 4.811                    |                           | 32       |
|               | EXP.3          | 20°C/100 $\mu$ M Aspirin | 142.853 $\pm$ 4.436                    | 0.012                     | 34       |
