# Supplementary material for: Aspirin increases metabolism through germline signalling to extend the lifespan of Caenorhabditis elegans
Source: PubMed Central journal article supplement (PMC5598954; doi:10.1371/journal.pone.0184027), 2017-09-14
Supplement: pone.0184027.s009.pdf [file pone.0184027.s009.pdf]

**Supplementary Table 8**

| <b>Figure</b>                         | <b>Strain</b> | <i>sod-3</i> | <i>lipl-4</i> | <i>lips-17</i> | <i>fard-1</i> | <i>acs-2</i> | <i>ech-1.2</i> | <i>cpt-5</i> |
|---------------------------------------|---------------|--------------|---------------|----------------|---------------|--------------|----------------|--------------|
| <b>N2(WT)</b>                         |               |              |               |                |               |              |                |              |
| <b>3(G)</b>                           | EXP.1         | 1.523        | 2.493         | 1.563          | 1.599         | 5.690        | 2.363          | 1.437        |
| <b>5(D)</b>                           | EXP.2         | 2.136        | 3.185         | 1.491          | 1.316         | 5.493        | 2.698          | 1.380        |
| <b>5(E)</b>                           | EXP.3         | 1.849        | 3.033         | 1.874          | 1.367         | 3.813        | 2.431          | 1.299        |
| <b>Mean</b>                           |               | 1.836        | 2.904         | 1.527          | 1.427         | 4.999        | 2.497          | 1.372        |
| <b>SEM</b>                            |               | 0.177        | 0.209         | 0.117          | 0.151         | 0.421        | 0.072          | 0.028        |
| <b>P value VS Control</b>             |               | 0.042        | 0.010         | 0.043          | 0.039         | 0.021        | 0.005          | 0.011        |
| <b>CF1903 <i>glp-1(e2141)III.</i></b> |               |              |               |                |               |              |                |              |
| <b>5(D)</b>                           | EXP.1         | 1.068        | 1.236         | 0.807          | 0.988         |              |                |              |
| <b>5(E)</b>                           | EXP.2         | 1.215        | 1.134         | 1.017          | 1.036         |              |                |              |
|                                       | EXP.3         | 1.131        | 1.255         | 1.101          | 1.178         |              |                |              |
| <b>Mean</b>                           |               | 1.138        | 1.208         | 0.975          | 1.067         |              |                |              |
| <b>SEM</b>                            |               | 0.043        | 0.037         | 0.087          | 0.057         |              |                |              |
| <b>P value VS Control</b>             |               | 0.083        | 0.031         | 0.124          | 0.080         |              |                |              |
