# Supplementary material for: Aspirin increases metabolism through germline signalling to extend the lifespan of Caenorhabditis elegans
Source: PubMed Central journal article supplement (PMC5598954; doi:10.1371/journal.pone.0184027), 2017-09-14
Supplement: pone.0184027.s010.pdf [file pone.0184027.s010.pdf]

## Supplementary Table 9

| Gene            | Type | Sequence                       |
|-----------------|------|--------------------------------|
| <i>cdc-42</i>   | F    | 5'-CTGCTGGACAGGAAGATTACG-3'    |
|                 | R    | 5'-CTCGGACATTCTCGAATGAAG-3'    |
| <i>fat-4</i>    | F    | 5'-ATTGACTGGCTTTGGGGAGG-3'     |
|                 | R    | 5'-CAGTAAGCGCATCCACCAGT-3'     |
| <i>hyl-1</i>    | F    | 5'-CCATATGCACCTCGCCTCAT-3'     |
|                 | R    | 5'-TCGTGAATCTGAACCGTTTTCAA-3'  |
| <i>Y41D4A.6</i> | F    | 5'-TTCCACATTTGCGGGTACT-3'      |
|                 | R    | 5'-GCGACGATTCTCTCCACGAT-3'     |
| <i>Y106GH.6</i> | F    | 5'-TCGCTCCATCTCTCCCGTTA-3'     |
|                 | R    | 5'-TTTGACGAAACCGTTGTGGC-3'     |
| <i>clpp-1</i>   | F    | 5'-GCATCTGCTGCGAAGGGTA-3'      |
|                 | R    | 5'-GCAGAACAGGGGGCAATAGA-3'     |
| <i>ccr-4</i>    | F    | 5'-AGTTCACCAACTCGACGGAC-3'     |
|                 | R    | 5'-AGAGAGGGAGAGCCAGTTGT-3'     |
| <i>egl-4</i>    | F    | 5'-CCGTTCCAGGCTAGTGATCC-3'     |
|                 | R    | 5'-TTGGTGGGGTGAGAATGAGC-3'     |
| <i>nkb-3</i>    | F    | 5'-TCCAGAGGAGATCAAGGGCA-3'     |
|                 | R    | 5'-CGAAACGAAAGAAATTGTGGGGA-3'  |
| <i>sod-3</i>    | F    | 5'-AGCATCATGCCACCTACGTGA-3'    |
|                 | R    | 5'-CACCACCATTGAATTCAGCG-3'     |
| <i>lipl-4</i>   | F    | 5'-ATGGCCGAGAAGTTCCTACATCGT-3' |
|                 | R    | 5'-GGTGAATTGGCGACCCAATCGAAA-3' |
| <i>lips-17</i>  | F    | 5'-ATCTGTTGCTGGAGCCAATCG-3'    |
|                 | R    | 5'-TATCCAACCTTATCGTCTCC-3'     |
| <i>fard-1</i>   | F    | 5'-GGGTTTTTGGGAAAGGTGAT-3'     |
|                 | R    | 5'-CCACCGATTGCTTTCAATTT-3'     |

---

|                |   |                             |
|----------------|---|-----------------------------|
| <i>acs-2</i>   | F | 5'-TCAATCCTCGTATCCCGCCG-3'  |
|                | R | 5'-TATTCGAGGTTCCGTGGATG-3'  |
| <i>ech-1.2</i> | F | 5'-TGGATAAGCTCCAATCCGA-3'   |
|                | R | 5'-ATTGGATGTCAGCTCCTG-3'    |
| <i>cpt-5</i>   | F | 5'-TCACACTGAACTGATCAAGAC-3' |
|                | R | 5'-GTAGAGCATATCGCCCTGC-3'   |

---
